# Supplementary material for: Female Adolescents with Severe Substance and Conduct Problems Have Substantially Less Brain Gray Matter Volume
Source: PubMed Central journal article supplement (PMC4441424; doi:10.1371/journal.pone.0126368), 2015-05-22
Supplement: pone.0126368.s002.pdf [file pone.0126368.s002.pdf]

**Supporting Information S1 Table: List of subjects who were prescribed some form of medication at the initial interview and at the time of the MRI.**

| <b>Subjects</b> | <b>On Medication at Initial Interview (0=No, 1=Yes)</b> | <b>If Yes, Name of medication</b>                                                                                 | <b>On Medication within 24 hrs of MR scan (0=No, 1=Yes)</b> | <b>If Yes, Name of medication</b>                   |
|-----------------|---------------------------------------------------------|-------------------------------------------------------------------------------------------------------------------|-------------------------------------------------------------|-----------------------------------------------------|
| control 1       | 0                                                       | N/A                                                                                                               | Not asked*                                                  | N/A                                                 |
| control 2       | 0                                                       | N/A                                                                                                               | Not asked*                                                  | N/A                                                 |
| control 3       | 1                                                       | Fluoxetine                                                                                                        | Not asked*                                                  | N/A                                                 |
| control 4       | 0                                                       | N/A                                                                                                               | Not asked*                                                  | N/A                                                 |
| control 5       | 1                                                       | Lansoprazole, Spironolactone                                                                                      | 1                                                           | Lansoprazole, Spironolactone                        |
| control 6       | 0                                                       | N/A                                                                                                               | 0                                                           | N/A                                                 |
| control 7       | 0                                                       | N/A                                                                                                               | 0                                                           | N/A                                                 |
| control 8       | 0                                                       | N/A                                                                                                               | 0                                                           | N/A                                                 |
| control 9       | 1                                                       | Ibuprofen                                                                                                         | 0                                                           | N/A                                                 |
| control 10      | 0                                                       | N/A                                                                                                               | 0                                                           | N/A                                                 |
| control 11      | 0                                                       | N/A                                                                                                               | 0                                                           | N/A                                                 |
| control 12      | 0                                                       | N/A                                                                                                               | 0                                                           | N/A                                                 |
| control 13      | 0                                                       | N/A                                                                                                               | 0                                                           | N/A                                                 |
| control 14      | 0                                                       | N/A                                                                                                               | 0                                                           | N/A                                                 |
| control 15      | 1                                                       | Birth control (name not specified)                                                                                | 1                                                           | Birth control (name not specified)                  |
| control 16      | 0                                                       | N/A                                                                                                               | 0                                                           |                                                     |
| control 17      | 1                                                       | Birth control (name not specified)                                                                                | 1                                                           | Birth control (name not specified)                  |
| control 18      | 0                                                       | N/A                                                                                                               | 0                                                           | N/A                                                 |
| control 19      | 0                                                       | N/A                                                                                                               | 0                                                           | N/A                                                 |
| control 20      | 0                                                       | N/A                                                                                                               | 0                                                           | N/A                                                 |
| control 21      | 0                                                       | N/A                                                                                                               | 0                                                           | N/A                                                 |
| Patient 1       | 0                                                       | N/A                                                                                                               | Not asked*                                                  | N/A                                                 |
| Patient 2       | 0                                                       | N/A                                                                                                               | 0                                                           | N/A                                                 |
| Patient 3       | 1                                                       | Methylphenidate, Amphetamine/Dextroamphetamine, Bupropion, Lamotrigine, Citalopram, Fluoxetine, Divalproex sodium | 1                                                           | Citalopram, Lamotrigine, Iron Supplement            |
| Patient 4       | 0                                                       | N/A                                                                                                               | 0                                                           | N/A                                                 |
| Patient 5       | 0                                                       | N/A                                                                                                               | 0                                                           | N/A                                                 |
| Patient 6       | 1                                                       | Oxcarbazepine                                                                                                     | 1                                                           | Oxcarbazepine, Levonorgestrel and Ethinyl Estradiol |
| Patient 7       | 1                                                       | Bupropion, Disulfiram                                                                                             | 1                                                           | Bupropion                                           |
| Patient 8       | 0                                                       | N/A                                                                                                               | 0                                                           | N/A                                                 |
| Patient 9       | 0                                                       | N/A                                                                                                               | 0                                                           | N/A                                                 |
| Patient 10      | 0                                                       | N/A                                                                                                               | 0                                                           | N/A                                                 |
| Patient 11      | 0                                                       |                                                                                                                   | 0                                                           | N/A                                                 |

|            |   |                                                                                 |   |                                                   |
|------------|---|---------------------------------------------------------------------------------|---|---------------------------------------------------|
| Patient 12 | 1 | N/A                                                                             | 0 | N/A                                               |
| Patient 13 | 1 | Birth control (name not specified)                                              | 1 | Birth control (name not specified)                |
| Patient 14 | 1 | Aripiprazole, Sertraline, Lamotrigine, Ropinirole, Inhaler (name not specified) | 1 | Aripiprazole, Sertraline, Lamotrigine, Ropinirole |
| Patient 15 | 0 | N/A                                                                             | 0 | N/A                                               |
| Patient 16 | 0 | N/A                                                                             | 0 | N/A                                               |
| Patient 17 | 0 | N/A                                                                             | 0 | N/A                                               |
| Patient 18 | 1 | Sertraline, Aripiprazole                                                        | 1 | Aripiprazole                                      |
| Patient 19 | 1 | Oxcarbazepine                                                                   | 0 | N/A                                               |
| Patient 20 | 0 | N/A                                                                             | 1 | Acetaminophen, Dextromethorphan, Doxylamine       |
| Patient 21 | 0 | N/A                                                                             | 1 | Ibuprofen                                         |
| Patient 22 | 1 | Antibiotics (name not specified)                                                | 1 | Aripiprazole                                      |

**\* The recency questionnaire for drug/medication use was later added to the study and therefore we do not have information of medication use on the day of MRI for 4 controls and 1 patient. However, it should be noted that the medication use for the most part did not differ between the off-site interview and on the day of MRI. Red indicates the subjects using some kind of medication.**
