# Supplementary material for: Female Adolescents with Severe Substance and Conduct Problems Have Substantially Less Brain Gray Matter Volume
Source: PubMed Central journal article supplement (PMC4441424; doi:10.1371/journal.pone.0126368), 2015-05-22
Supplement: pone.0126368.s003.pdf [file pone.0126368.s003.pdf]

**Supporting Information S2 Table. Region of Interest analyses without the medicated subjects.**

**Region of interest (ROIs) where GM volumes in female controls exceeded volumes in SCP patients after excluding subjects on medication.** The table presents GM volume in each group for ROIs where controls>patients (in the whole-brain) after removing the subjects who were on medication at the initial interview. The table also includes total GM volume for each group.

|                                                            | <b>Controls (n=16)</b> | <b>Patients (n=13)</b> | <b>Reduction (%)</b> |                 |
|------------------------------------------------------------|------------------------|------------------------|----------------------|-----------------|
| <b>Significant Cluster (from the whole-brain analyses)</b> | <b>(means±sd)</b>      | <b>(means±sd)</b>      | <b>Patients</b>      | <b>p-value*</b> |
| <b>Cingulate Gyrus</b>                                     | 0.57±0.06              | 0.51±0.06              | 10.53                | 0.02            |
| <b>Medial Prefrontal Cortex</b>                            | 0.49±0.05              | 0.45±0.08              | 8.16                 | 0.01            |
| <b>Left Ventrolateral Prefrontal Cortex</b>                | 0.54±0.05              | 0.42±0.10              | 22.22                | 0.002           |
| <b>Right Dorsolateral Prefrontal Cortex</b>                | 0.63±0.05              | 0.54±0.06              | 14.29                | 0.002           |
| <b>Medial Orbitofrontal Cortex</b>                         | 0.52±0.05              | 0.44±0.06              | 15.38                | 0.002           |
| <b>Left Somatosensory Motor Cortex</b>                     | 0.55±0.04              | 0.48±0.07              | 12.73                | 0.0007          |
| <b>Left Angular Gyrus</b>                                  | 0.54±0.06              | 0.44±0.08              | 18.52                | 0.002           |
| <b>Right Angular Gyrus</b>                                 | 0.61±0.03              | 0.52±0.06              | 14.75                | 0.0002          |
| <b>Right Somatosensory Motor Cortex</b>                    | 0.55±0.07              | 0.46±0.09              | 16.36                | 0.002           |
| <b>Total GM Volume (ml)</b>                                | 681.81±47.94           | 611.27±62.99           | 9.47                 | 0.011           |

\*Analyses of covariance: ROI as dependent variable and group, age and IQ as covariates.
